# Supplementary material for: Accounting for Precipitation Asymmetry in a Multiplicative Random Cascades Disaggregation Model
Source: Copernicus journal article supplement (doi:10.5194/egusphere-2023-544), 2023-04-05
Supplement: Supplementary file 1 [file egusphere-2023-544-supplement.pdf]

## S1 Fitted models

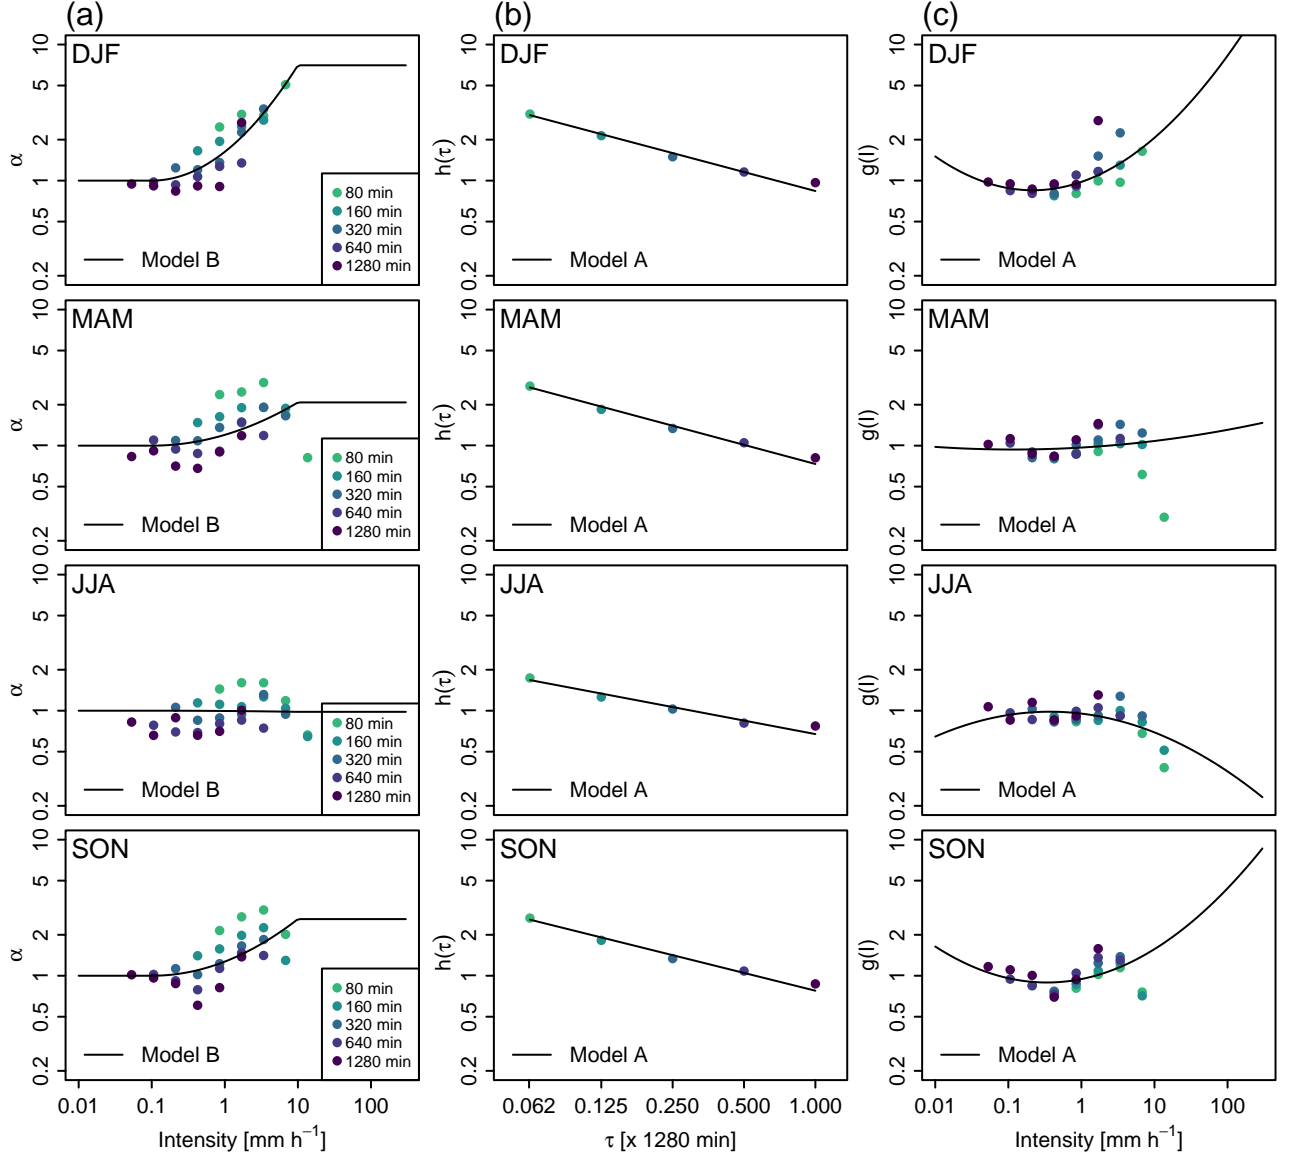

**Figure S1.** Parameter  $\alpha$  of the Beta distribution for  $f_{W+}$ . (a) Estimates  $\alpha$  at each temporal scale and intensity class (solid circles) against the intensity and fitted scaling model B, Eq. (13) (solid black line). (b) and (c) the two scaling sub-models for  $\alpha$  in model A. (b) Model  $h(\tau)$  (equation 11) and (b) model  $g(I)$  (equation 12). See Fig. 1 for caption details. Data from the Zurich station, all seasons.

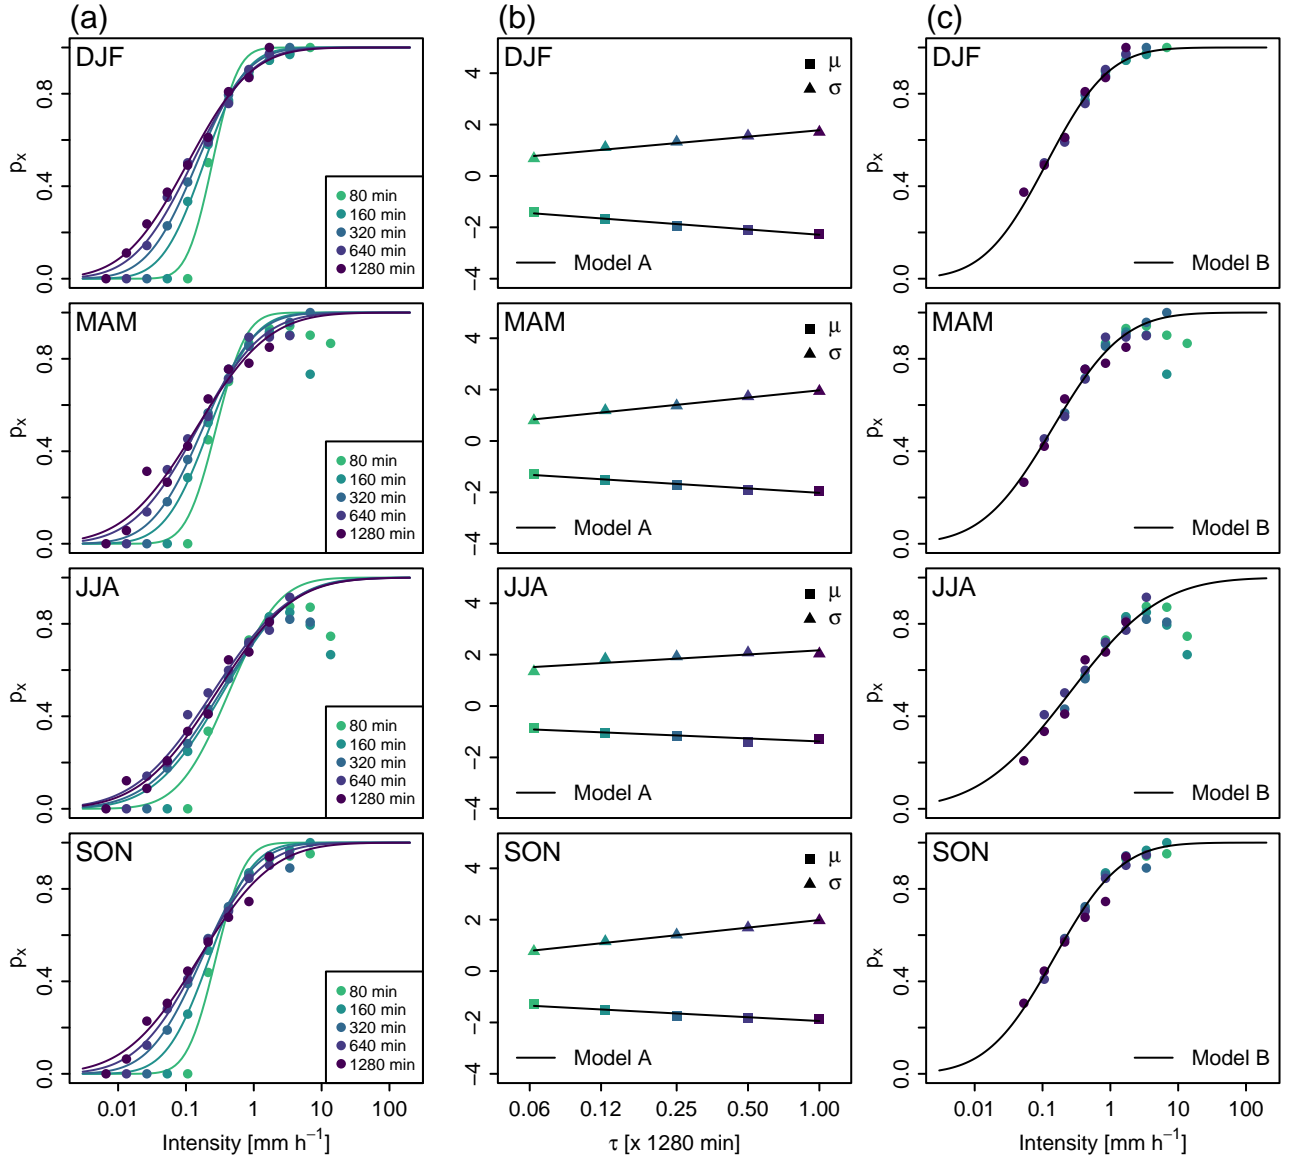

**Figure S2.** Non-zero subdivisions probability  $p_x$ . (a)  $p_x$  estimates for different classes of intensity and temporal scale and scaling model  $p_x(I, \tau)$  in model A, Eq. (6). (b) Scaling models for the parameters  $\mu(\tau)$  and  $\sigma(\tau)$  in model A (equations 7 and 8, respectively). (c) Scaling model of  $p_x(I)$ , Eq. (9), in model B (precipitation data below 0.8 mm threshold are disregarded). See Fig. 1 for details.

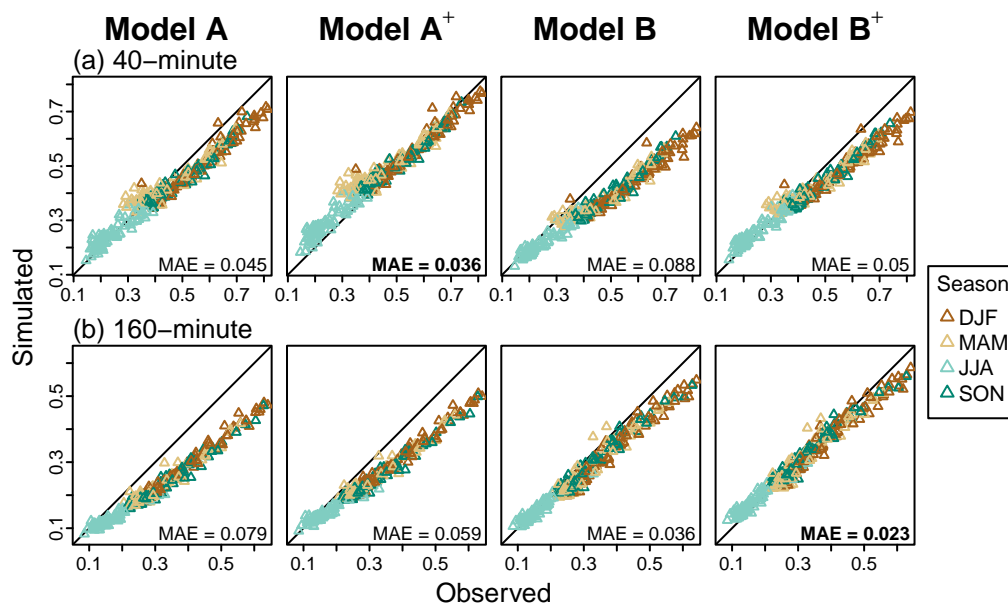

**Figure S3.** Observed versus simulated lag-2 autocorrelation at (a) 40-minute in resolution (b) and 160-minute resolution. Same notation as in Fig. 5.

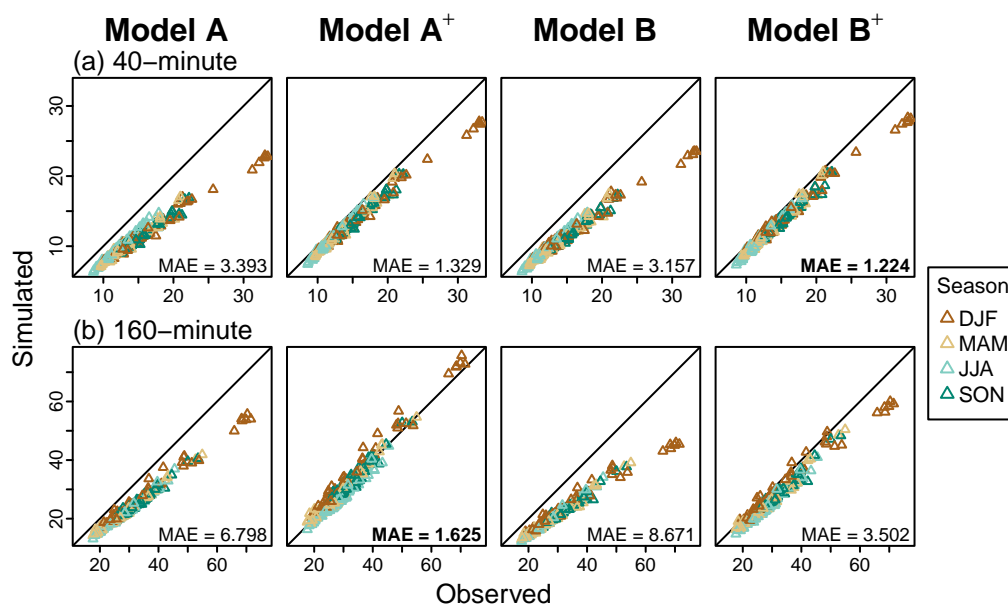

**Figure S4.** Observed versus simulated mean length of dry spells. Same notation as in Fig. 5.

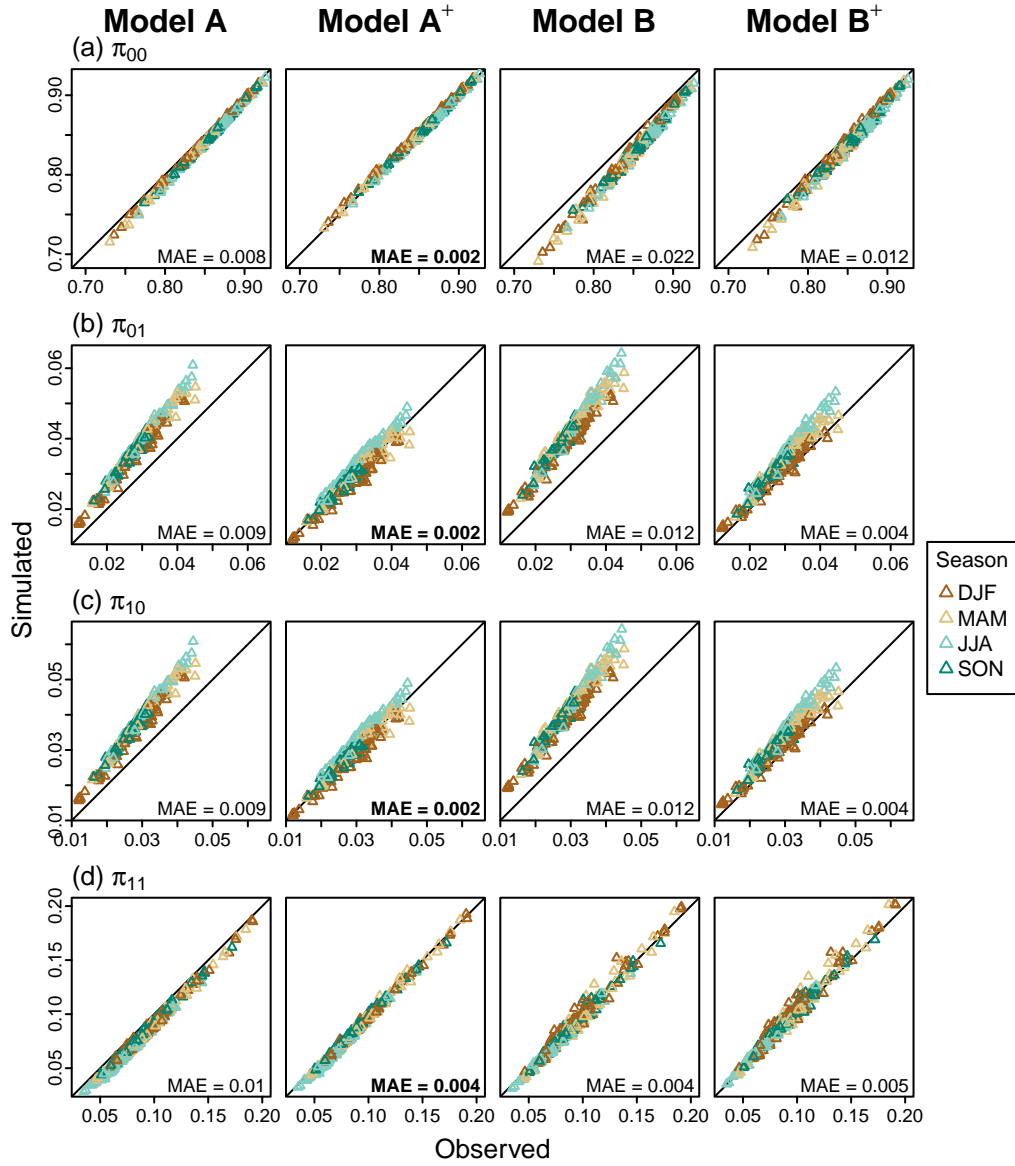

**Figure S5.** Observed versus simulated transition probabilities at 40-minute resolution at each site for each model. (a)  $\pi_{00} = P(R_t = 0, R_{t-1} = 0)$ , (b)  $\pi_{01} = P(R_{t-1} = 0, R_t = 1)$ , (c)  $\pi_{10} = P(R_{t-1} = 1, R_t = 0)$  and (d)  $\pi_{11} = P(R_{t-1} = 1, R_t = 1)$ , where 0 and 1 refer to dry/wet steps respectively. Same notation as in Fig. 5.

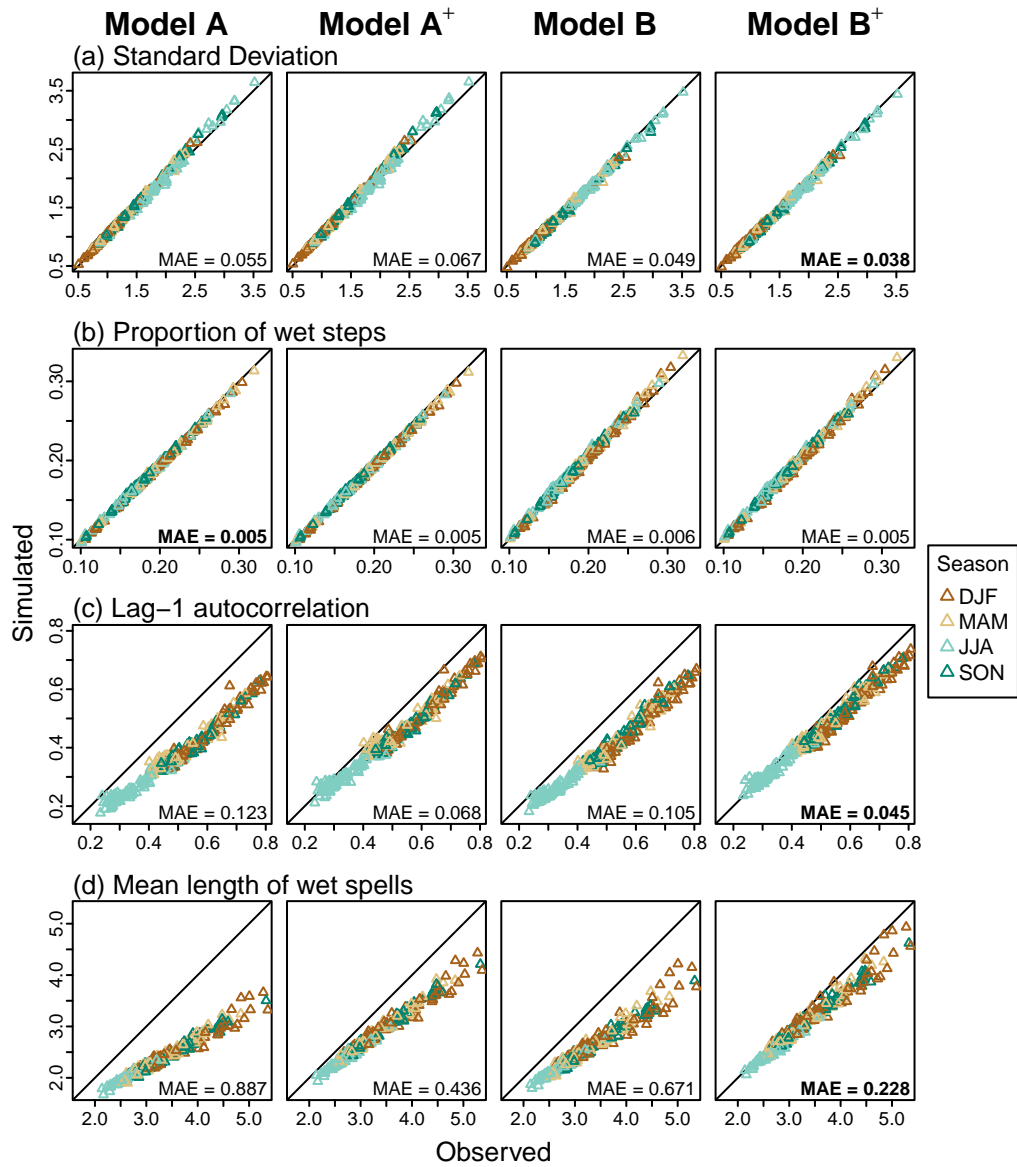

**Figure S6.** Observed versus simulated statistics for different metrics at 160-minute aggregation level. Same notation as in Fig. 5.

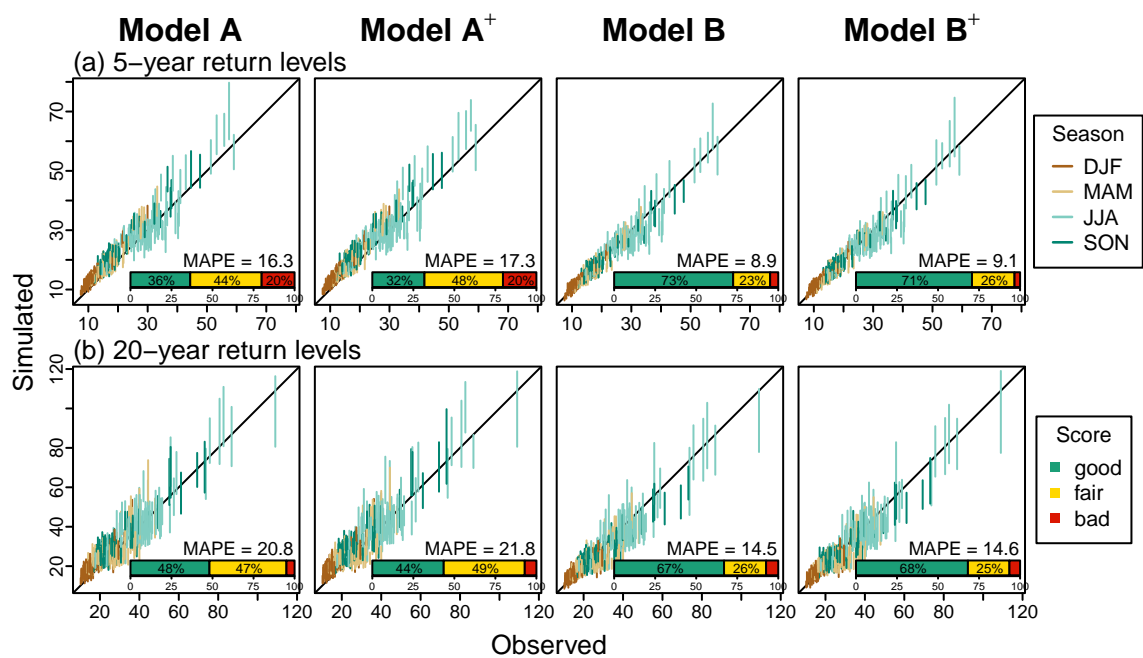

**Figure S7.** Observed versus simulated return levels at 160-minute temporal resolution for 5- and 20-year return periods, (a) and (b) respectively. See Fig. 6 for details.
